# Supplementary material for: Identification of Perturbed Pathways Rendering Susceptibility to Tuberculosis in Type 2 Diabetes Mellitus Patients Using BioNSi Simulation of Integrated Network of Implicated Human Genes
Source: Research Square preprint supplement (doi:10.21203/rs.3.rs-863821/v1), 2021-09-03
Supplement: Supplementary file 2 [file 3a2c9070a4cb5734f839c92d.xlsx]

## Sheet: Supplementary_Table_3_Diff_Expr
	logFC	AveExpr	t	P.Value	adj.P.Val	B
DEFA1	1.4238	3.837	4.01696	0.000430729	0.0400251	0.0495624
FOXO1A	0.606927	1.91155	7.88874	1.92e-08	0.000312696	8.90022
IRS1	-0.51202	1.24138	-7.65716	3.36e-08	0.000312696	8.42273
ITGB3	1.10893	0.775993	5.96822	2.41e-06	0.0143618	4.69232
MICALCL	0.938585	1.10578	5.8732	3.1e-06	0.0143618	4.47113
KRT1	1.21342	1.50046	5.78485	3.91e-06	0.0143618	4.26462
TRIP12	0.589724	2.15194	5.60903	6.22e-06	0.0143618	3.85138
C6orf85	0.400696	0.191499	5.56413	7e-06	0.0143618	3.74539
BCL2L1	0.819392	2.91091	5.53086	7.65e-06	0.0143618	3.66675
BAT3	0.45857	1.68311	5.51185	8.04e-06	0.0143618	3.62176
WNK1	1.06536	1.25839	5.49542	8.4e-06	0.0143618	3.58287
WDR40A	0.71583	3.75814	5.49186	8.48e-06	0.0143618	3.57445
ECSIT	0.60928	0.469937	5.38805	1.12e-05	0.0173442	3.32819
MBNL3	0.383399	0.518107	5.30283	1.4e-05	0.0185828	3.12546
ZYG11BL	0.377932	0.753768	5.25357	1.6e-05	0.0185828	3.00807
MPP1	0.614315	3.08613	5.24794	1.62e-05	0.0185828	2.99463
SKAP2	0.527229	1.39356	5.23637	1.67e-05	0.0185828	2.96704
C2orf17	0.607628	1.75523	5.22371	1.73e-05	0.0185828	2.93684
C13orf18	0.539959	1.42348	5.19068	1.89e-05	0.0185828	2.85798
CHPT1	0.615354	1.26165	5.17005	2e-05	0.0185828	2.80869
SMOX	0.605554	1.7023	5.16792	2.01e-05	0.0185828	2.80362
RNF10	0.587074	2.82175	5.15205	2.09e-05	0.0185828	2.76568
PRR6	0.613267	1.7636	5.09953	2.41e-05	0.0204067	2.64009
ITGB5	0.623585	1.70206	5.05751	2.7e-05	0.0205241	2.53952
PAQR9	0.364244	-0.342727	5.0489	2.76e-05	0.0205241	2.51891
SYNPO	-0.333588	-0.0550849	-5.02048	2.98e-05	0.0205241	2.45082
KISS1	0.322908	-0.326091	5.01451	3.02e-05	0.0205241	2.43653
UBE2H	0.630008	1.09454	4.99773	3.16e-05	0.0205241	2.39633
NR5A1	0.451461	-0.480849	4.99603	3.18e-05	0.0205241	2.39225
ZRANB1	0.578206	1.22533	4.99151	3.22e-05	0.0205241	2.38142
IFNA7	-0.469407	-0.141488	-4.98125	3.3e-05	0.0205241	2.35681
2020-03-02	0.540182	1.12901	4.96125	3.49e-05	0.0209519	2.30888
LRRC4B	-0.324959	-0.366493	-4.9339	3.75e-05	0.0218132	2.24329
LOC168474	0.324518	-0.381262	4.92278	3.86e-05	0.0218132	2.21662
HOXC12	-0.396394	-0.500114	-4.89812	4.13e-05	0.0226141	2.15746
RPL10	-0.652662	-0.247709	-4.85487	4.63e-05	0.0228612	2.05369
ANGPTL2	-0.45847	-0.156074	-4.85473	4.63e-05	0.0228612	2.05335
MCEMP1	0.556825	2.31759	4.85269	4.66e-05	0.0228612	2.04844
OR8B12	-0.463754	-0.184641	-4.85244	4.66e-05	0.0228612	2.04784
SLC4A1	1.25934	2.26932	4.84217	4.79e-05	0.0228949	2.02319
HP	0.695422	0.369045	4.8247	5.02e-05	0.0230063	1.98127
RHCE	0.317626	0.021307	4.82164	5.06e-05	0.0230063	1.97392
SLAMF8	-0.456522	0.0133539	-4.79164	5.49e-05	0.0243338	1.9019
ABCA9	-0.419012	-0.109327	-4.77646	5.71e-05	0.0247518	1.86546
FLJ11151	0.508456	1.21185	4.76047	5.96e-05	0.0252458	1.82705
KRTAP19-2	0.535701	-0.598793	4.71731	6.69e-05	0.0276897	1.72342
LIMS1	0.508841	0.901746	4.69077	7.18e-05	0.0276897	1.65971
THRAP5	0.45238	1.88988	4.68447	7.3e-05	0.0276897	1.64456
LOC644615	0.558241	0.00590737	4.67051	7.58e-05	0.0276897	1.61105
PCTP	0.416158	0.625666	4.65497	7.9e-05	0.0276897	1.57375
HPSE	0.460077	0.852479	4.65338	7.94e-05	0.0276897	1.56993
TMEM40	0.549347	0.313813	4.65294	7.95e-05	0.0276897	1.56887
MAP2K3	0.678218	0.669377	4.65083	7.99e-05	0.0276897	1.56381
IL6R	1.0821	1.02319	4.63102	8.43e-05	0.0276897	1.51624
ADIPOR1	0.560269	3.59715	4.62926	8.47e-05	0.0276897	1.51201
RANBP10	0.546493	1.50197	4.61455	8.8e-05	0.0276897	1.47669
MFSD4	-0.433362	-0.512606	-4.61305	8.84e-05	0.0276897	1.47311
PRSS2	-0.447061	-0.323073	-4.60951	8.92e-05	0.0276897	1.4646
DACT1	0.267455	-0.329379	4.60648	9e-05	0.0276897	1.45732
2020-03-03	0.430449	0.406154	4.60519	9.03e-05	0.0276897	1.45423
IQWD1	0.47811	1.12422	4.59883	9.18e-05	0.0276897	1.43895
STMN2	-0.474754	-0.0992593	-4.59557	9.26e-05	0.0276897	1.43113
MMP9	0.907631	2.6087	4.5953	9.27e-05	0.0276897	1.43049
OR4D2	-0.406944	-0.308365	-4.59153	9.36e-05	0.0276897	1.42143
UBE2R2	-0.361487	0.0928913	-4.58345	9.57e-05	0.0278514	1.40204
C3orf27	-0.360425	-0.218438	-4.56866	9.95e-05	0.0285271	1.36655
TMOD1	0.725645	1.82444	4.54533	0.000105922	0.0299004	1.31056
BRD4	0.467443	0.317971	4.50358	0.000118402	0.0326942	1.21041
TMEM81	-0.538594	-0.0986532	-4.50066	0.000119328	0.0326942	1.2034
GPR97	0.705025	0.962182	4.48073	0.00012584	0.0336945	1.15563
TUBB2C	0.544047	1.779	4.47832	0.000126653	0.0336945	1.14984
CORO1C	0.338788	1.71933	4.47317	0.000128405	0.0336945	1.13749
F5	0.476922	1.13215	4.44288	0.0001392	0.0338387	1.0649
FLJ13639	0.363368	0.493419	4.43846	0.000140852	0.0338387	1.0543
C1orf128	0.830435	3.10708	4.43843	0.000140863	0.0338387	1.05423
C17orf76	0.36481	0.079218	4.43643	0.000141615	0.0338387	1.04944
NCF2	0.441797	2.24086	4.43131	0.000143559	0.0338387	1.03718
ENTPD4	0.80566	1.29186	4.43004	0.000144047	0.0338387	1.03413
HRASLS2	-0.666684	0.0487913	-4.42705	0.000145201	0.0338387	1.02696
AGPAT6	-0.324187	0.035636	-4.42553	0.000145788	0.0338387	1.02333
C6orf211	0.376332	0.148413	4.41317	0.000150667	0.0338387	0.993728
C1orf183	0.390041	0.409459	4.40672	0.000153281	0.0338387	0.978258
C9orf10OS	0.373455	0.814562	4.40248	0.000155018	0.0338387	0.968124
MTMR3	0.603888	1.38134	4.40229	0.000155097	0.0338387	0.967666
C20orf108	0.639033	2.61027	4.40109	0.000155593	0.0338387	0.964797
DNAJA4	0.577112	1.85353	4.3977	0.000157005	0.0338387	0.956672
LETM1	-0.294527	-0.100694	-4.39668	0.000157432	0.0338387	0.954233
DHX34	0.375002	1.53956	4.3953	0.000158014	0.0338387	0.950911
ZNF551	0.293508	-0.0148447	4.38807	0.000161086	0.0338889	0.933602
EDN2	0.367776	-0.270104	4.3862	0.000161887	0.0338889	0.929143
TRIM63	-0.473655	-0.144257	-4.37672	0.000166024	0.0343688	0.90645
COL5A1	-0.352266	-0.129763	-4.3678	0.000170013	0.0345123	0.8851
DYRK3	0.355179	-0.324148	4.3669	0.000170422	0.0345123	0.882942
LOC81558	0.58426	0.830452	4.36137	0.000172948	0.0346472	0.869712
MID1IP1	0.362594	1.6479	4.35463	0.000176079	0.0348992	0.853579
LOC653600	1.57167	3.17059	4.34172	0.000182232	0.0357386	0.822692
E2F2	0.638205	3.10667	4.33765	0.000184217	0.0357515	0.812954
DRD2	-0.33518	-0.304615	-4.3136	0.000196383	0.0369722	0.755448
F13A1	0.69037	1.98726	4.30983	0.000198361	0.0369722	0.746439
CBX1	0.284313	0.928358	4.30161	0.000202742	0.0369722	0.726799
ARF6	-0.596103	0.0177139	-4.29951	0.000203875	0.0369722	0.721786
RTN3	0.38539	1.09888	4.29905	0.000204124	0.0369722	0.72069
WDR53	0.396664	0.534605	4.29642	0.000205559	0.0369722	0.714391
TCN1	0.717914	1.66583	4.29516	0.000206248	0.0369722	0.711383
C5orf20	-0.300451	0.3125	-4.29491	0.000206382	0.0369722	0.710796
SLC25A37	0.55915	4.72155	4.28943	0.000209408	0.0371015	0.697709
LCN2	0.920237	2.5336	4.28355	0.000212708	0.0371015	0.683654
SH3PXD2B	-0.448174	-0.157277	-4.2829	0.000213078	0.0371015	0.68209
MGC50559	-0.34504	-0.318312	-4.27233	0.000219145	0.0371545	0.656848
MGC2803	0.62923	1.94806	4.26714	0.000222185	0.0371545	0.644462
APC	-0.456345	-0.372721	-4.26368	0.000224235	0.0371545	0.636206
NTAN1	0.469323	1.78549	4.26155	0.000225509	0.0371545	0.63111
TSP50	-0.340731	-0.396194	-4.257	0.000228248	0.0371545	0.620256
OLFM4	1.1936	1.1788	4.25212	0.000231226	0.0371545	0.608604
PTPN1	0.475704	2.07017	4.24919	0.000233029	0.0371545	0.601619
WDR13	0.364986	1.91191	4.24844	0.000233493	0.0371545	0.59983
EPC1	0.533846	0.437183	4.24545	0.000235353	0.0371545	0.592697
CEACAM8	1.12465	1.12589	4.24369	0.000236458	0.0371545	0.588485
MYEOV2	-0.520328	-0.059297	-4.23501	0.000241968	0.0371545	0.567778
CARD12	0.403618	0.946632	4.2295	0.00024553	0.0371545	0.554638
DDX17	0.442226	1.64762	4.22425	0.000248974	0.0371545	0.542119
DGAT2L6	0.319963	-0.501399	4.22271	0.000249994	0.0371545	0.538442
LOC653133	0.912854	0.873902	4.22142	0.000250846	0.0371545	0.535384
ST3GAL1	0.665687	1.36698	4.21986	0.00025189	0.0371545	0.531651
TMCC2	0.673972	0.656562	4.21709	0.000253747	0.0371545	0.525046
TREML1	0.572918	0.84285	4.2168	0.000253945	0.0371545	0.524346
BBOX1	-0.540691	-0.235178	-4.2138	0.000255969	0.0371545	0.517211
TNIP1	0.392568	2.6018	4.2112	0.000257739	0.0371545	0.511014
ELOVL7	0.303969	-0.271191	4.20917	0.000259131	0.0371545	0.506171
NUDT17	-0.347139	-0.174728	-4.19967	0.000265742	0.0371545	0.483526
2020-12-01	-0.351162	-0.433389	-4.19061	0.0002722	0.0371545	0.461943
COX4NB	0.336317	0.370084	4.19058	0.000272223	0.0371545	0.461868
ZBTB44	0.322648	1.21067	4.18585	0.000275654	0.0371545	0.450609
AFTPH	0.324373	1.53642	4.1857	0.000275767	0.0371545	0.450241
LOC388610	0.333457	-0.0861846	4.18367	0.00027725	0.0371545	0.445419
GBP6	-0.430942	-0.130344	-4.1826	0.000278041	0.0371545	0.442861
C10orf9	0.34543	0.573061	4.17997	0.000279984	0.0371545	0.4366
FLJ36208	0.278873	0.0467806	4.17415	0.000284331	0.0371545	0.42275
TTLL10	-0.340777	-0.483534	-4.16758	0.000289323	0.0371545	0.407107
CARD6	0.420626	0.0387279	4.16212	0.000293539	0.0371545	0.394105
WDR26	0.419529	1.46277	4.15787	0.000296858	0.0371545	0.383998
DEFA3	1.47189	3.29726	4.15724	0.00029736	0.0371545	0.38248
ZNF532	-0.409922	0.13951	-4.15432	0.000299665	0.0371545	0.375542
LOC654346	-0.774093	-0.43851	-4.1538	0.000300078	0.0371545	0.374304
UBE2O	0.517989	1.72363	4.15279	0.000300879	0.0371545	0.371908
FLJ36980	-0.341498	-0.186277	-4.15263	0.000301011	0.0371545	0.371514
CDADC1	0.256435	-0.21746	4.15061	0.000302622	0.0371545	0.366715
PRR15	-0.66367	-0.0210914	-4.14968	0.000303368	0.0371545	0.364504
SARS	0.369616	1.15567	4.14834	0.000304443	0.0371545	0.361323
KIAA0261	0.494131	0.895655	4.14664	0.000305816	0.0371545	0.357279
SLC25A18	0.329318	-0.443248	4.14652	0.000305919	0.0371545	0.356976
FAM101B	0.677669	1.44446	4.14501	0.000307138	0.0371545	0.353402
EPB41	0.391676	0.513905	4.14346	0.000308408	0.0371545	0.349695
FRAT1	0.488424	1.41431	4.14309	0.000308706	0.0371545	0.348828
GMPR	0.777676	2.33962	4.13898	0.000312082	0.0371545	0.339052
TNFRSF10A	0.550474	0.548374	4.13896	0.000312098	0.0371545	0.339005
CREBBP	0.418387	1.36461	4.13715	0.000313595	0.0371545	0.334705
WNT9B	-0.573844	-0.119345	-4.13467	0.000315664	0.0371545	0.328796
TMPRSS9	1.00168	0.792601	4.13444	0.00031585	0.0371545	0.328265
TMEM16A	0.368237	-0.798783	4.12911	0.00032034	0.0371545	0.31558
TNRC5	0.43881	1.76454	4.12813	0.000321167	0.0371545	0.313263
ALDH5A1	0.464277	0.961338	4.12572	0.000323228	0.0371545	0.307515
OR7G2	-0.9527	-0.0898406	-4.12477	0.000324041	0.0371545	0.305259
FAM53A	-0.369792	-0.188063	-4.12358	0.000325059	0.0371545	0.302438
KIR2DL4	0.325261	-0.257944	4.11245	0.000334773	0.0379852	0.275979
CSMD1	0.381766	-0.328589	4.11061	0.000336405	0.0379852	0.271608
IFIT1L	0.690199	2.16882	4.10528	0.000341172	0.0380709	0.258963
H19	0.362874	-0.189003	4.10519	0.000341251	0.0380709	0.258756
BECN1	0.454076	1.41759	4.10029	0.0003457	0.0383377	0.247118
C15orf2	-0.630202	-0.16962	-4.09102	0.000354275	0.0390562	0.225101
TBC1D3B	0.418785	0.946187	4.08589	0.000359107	0.0393099	0.212928
MSRA	0.314697	1.66679	4.08249	0.000362348	0.0393099	0.204855
ITGA2B	0.914144	1.54553	4.0777	0.00036696	0.0393099	0.193493
MARK3	0.329228	0.945887	4.07233	0.000372203	0.0393099	0.180747
DNAJC5	0.533219	1.00385	4.07195	0.000372576	0.0393099	0.179846
UBTD1	0.570436	0.992861	4.07166	0.000372864	0.0393099	0.179152
UGT2A3	0.271217	-0.378102	4.06985	0.000374649	0.0393099	0.174863
C9orf43	-0.412759	-0.00044176	-4.06691	0.000377565	0.0393099	0.167896
RNF186	-0.486616	-0.211122	-4.06524	0.000379237	0.0393099	0.163928
KRTAP4-7	-0.559265	-0.345386	-4.06343	0.000381056	0.0393099	0.159628
NCF4	0.626258	2.11658	4.0632	0.000381279	0.0393099	0.159102
C12orf54	-0.416723	-0.336047	-4.06115	0.000383352	0.0393099	0.154231
WDR1	0.565508	2.40815	4.05789	0.000386662	0.0393099	0.146507
RAB5C	0.47362	1.81103	4.05701	0.000387562	0.0393099	0.144421
SRXN1	0.400225	1.84174	4.0545	0.000390133	0.0393099	0.138479
UROD	0.334968	2.11158	4.05431	0.000390335	0.0393099	0.138015
EHHADH	0.403622	-0.47583	4.05065	0.000394117	0.0394597	0.129354
C20orf14	0.403828	0.03251	4.04879	0.000396058	0.0394597	0.124938
AVPR1B	-0.494946	-0.252555	-4.04531	0.000399714	0.0394671	0.116685
CTTN	0.389205	0.701381	4.04469	0.000400369	0.0394671	0.115214
ZNF268	0.243959	-0.45659	4.03799	0.0004075	0.0397241	0.0993563
CDC14B	0.809693	1.51428	4.03701	0.000408555	0.0397241	0.0970334
PASK	0.639203	0.672925	4.03626	0.000409373	0.0397241	0.095238
APP	0.477354	0.492267	4.03348	0.000412382	0.0398088	0.0886583
LOC387680	0.552884	0.136123	4.02774	0.000418664	0.0400251	0.0750795
CTDSP1	0.428324	1.45912	4.02332	0.000423574	0.0400251	0.0646079
PLXNC1	0.843913	0.757214	4.02221	0.00042481	0.0400251	0.0619893
TRPC5	-0.748687	0.00360109	-4.02152	0.00042559	0.0400251	0.060343
LOC651423	0.403418	3.0313	4.01926	0.000428125	0.0400251	0.0550079
ZNF157	-0.449227	-0.246594	-4.01701	0.000430681	0.0400251	0.0496634
TCIRG1	0.328673	0.902646	4.01601	0.000431809	0.0400251	0.047313
CDKL1	0.414393	0.319236	4.01407	0.000434028	0.0400315	0.0427106
ACOT8	0.428089	0.31942	4.01147	0.00043701	0.0401081	0.0365596
NDEL1	0.468414	2.32823	4.00808	0.000440924	0.0401492	0.0285532
C7orf20	0.535674	0.454178	4.00505	0.000444459	0.0401492	0.0213804
C2orf24	0.453757	2.16904	4.00406	0.000445619	0.0401492	0.0190408
SIRT3	-0.556204	-0.148017	-4.00074	0.000449539	0.0401492	0.0111756
ZNF653	0.343492	1.65889	4.00046	0.000449866	0.0401492	0.0105212
STAC	-0.379524	-0.195667	-4.00002	0.000450389	0.0401492	0.0094793
SLC25A36	0.428824	0.245073	3.9966	0.000454465	0.0403197	0.00138832
HIST1H2BJ	0.553183	1.5916	3.99419	0.000457355	0.0403838	-0.00430512
IL1RAPL2	0.27817	-0.341469	3.99167	0.000460392	0.0404602	-0.0102468
CHRNB3	-0.478039	0.013934	-3.98966	0.000462843	0.0404846	-0.0150144
UBAP1	0.431421	2.44618	3.98597	0.000467355	0.0405246	-0.0237275
MGC45438	-0.418295	-0.0592851	-3.98561	0.0004678	0.0405246	-0.0245802
BNIP3L	0.500019	0.826549	3.98268	0.000471424	0.0405246	-0.0315097
MICAL2	0.512308	0.42085	3.98069	0.000473896	0.0405246	-0.0362073
CHD3	-0.446372	0.180318	-3.9791	0.000475877	0.0405246	-0.0399515
GPR148	-0.283657	-0.213028	-3.97836	0.000476805	0.0405246	-0.0417022
SLC6A8	0.771535	1.70248	3.9754	0.000480533	0.0405246	-0.0486943
CD82	0.578831	1.1936	3.97435	0.000481863	0.0405246	-0.0511763
C1orf146	0.359265	-0.579571	3.97124	0.000485827	0.0405246	-0.0585324
TMED4	0.506972	1.96646	3.9709	0.000486255	0.0405246	-0.0593236
TLK2	0.478218	1.23421	3.97014	0.000487226	0.0405246	-0.0611138
ABHD7	-0.606795	0.128861	-3.95851	0.000502365	0.0414743	-0.0885852
ORM1	0.723433	1.28787	3.95696	0.000504413	0.0414743	-0.0922384
HTATIP2	0.401542	2.06266	3.95627	0.000505322	0.0414743	-0.0938554
WDR65	-0.523122	-0.111825	-3.95	0.000513728	0.0414877	-0.108665
GRK6	0.659836	1.38726	3.94968	0.000514153	0.0414877	-0.109408
RAB32	0.44757	2.41328	3.94933	0.000514636	0.0414877	-0.110251
NET1	0.339354	0.152417	3.94763	0.000516939	0.0414877	-0.114259
RELA	0.605013	0.613238	3.94692	0.000517905	0.0414877	-0.115935
MRCL3	-0.364324	4.28778	-3.94622	0.000518847	0.0414877	-0.117565
WASF2	0.953938	2.40541	3.94395	0.000521958	0.0415316	-0.122933
CREG1	0.427634	2.00387	3.94124	0.000525679	0.0415316	-0.12931
SEC14L1	0.650459	2.58779	3.94054	0.000526657	0.0415316	-0.130977
C2orf3	-0.570441	0.0474497	-3.93891	0.000528918	0.0415316	-0.134823
HSN2	0.346338	-0.12776	3.93604	0.00053291	0.0415316	-0.141573
FUT11	-0.668972	-0.0830746	-3.9347	0.000534789	0.0415316	-0.144731
PRRX2	-0.434523	-0.406137	-3.93298	0.000537219	0.0415316	-0.148801
WNT6	-0.337362	-0.2098	-3.93297	0.000537229	0.0415316	-0.148818
CCHCR1	-0.587538	-0.382579	-3.92979	0.000541726	0.0415334	-0.1563
MGC3123	0.460113	0.400543	3.92735	0.000545208	0.0415334	-0.162051
NALP1	0.515672	0.608466	3.92495	0.000548659	0.0415334	-0.167713
FAM10A6	0.337166	-0.417773	3.92455	0.000549233	0.0415334	-0.168652
TOP1P2	0.355673	0.741217	3.92438	0.000549479	0.0415334	-0.169054
STX1A	0.414071	0.394178	3.92095	0.000554447	0.0415334	-0.177131
GSC	-0.552982	0.0385743	-3.91898	0.000557326	0.0415334	-0.18178
BP75	0.405639	0.147292	3.91854	0.000557973	0.0415334	-0.182821
PRUNE	0.353181	1.36046	3.91851	0.000558018	0.0415334	-0.182894
BMPER	-0.497609	-0.316831	-3.91747	0.000559545	0.0415334	-0.185346
ALAS2	0.635096	2.62669	3.9155	0.000562437	0.0415824	-0.189973
FADS6	-0.617889	0.0669563	-3.91104	0.000569065	0.0419062	-0.200488
GRIN2B	-0.689643	-0.192117	-3.90756	0.000574283	0.0420469	-0.208679
LOC402682	-0.401894	0.00866823	-3.90556	0.00057729	0.0420469	-0.213366
GRTP1	0.313454	-0.0859145	3.90052	0.000584983	0.0420469	-0.225244
HHAT	-0.484244	-0.370999	-3.89739	0.000589792	0.0420469	-0.232591
ARFIP2	-0.816902	0.0270858	-3.89621	0.000591623	0.0420469	-0.235371
RRAGD	0.348957	1.7699	3.89604	0.000591887	0.0420469	-0.235772
TMEM86B	0.401422	2.18592	3.89563	0.000592533	0.0420469	-0.236751
ENPP7	-0.257867	-0.158929	-3.89375	0.000595454	0.0420469	-0.241163
MFHAS1	0.666828	0.726485	3.8932	0.000596316	0.0420469	-0.242462
NUFIP1	-0.478559	-0.020506	-3.88738	0.000605486	0.0420469	-0.256154
GABRA5	0.324854	-0.41214	3.88736	0.000605512	0.0420469	-0.256193
PPP4R1	0.335763	2.09268	3.88534	0.00060872	0.0420469	-0.260934
MPO	0.930964	0.884875	3.88412	0.000610676	0.0420469	-0.263813
IPMK	-0.418906	0.0177616	-3.88135	0.000615122	0.0420469	-0.27032
ST7	0.257989	0.379707	3.88078	0.000616037	0.0420469	-0.271654
CSDA	0.401233	4.86886	3.87981	0.000617612	0.0420469	-0.273946
SLC37A3	0.434458	0.0913828	3.87793	0.000620649	0.0420469	-0.278347
GADD45A	0.3815	1.54774	3.87643	0.000623092	0.0420469	-0.281871
PECAM1	0.507211	2.53579	3.876	0.000623796	0.0420469	-0.282884
XPO7	0.49531	1.87535	3.87251	0.000629535	0.0420469	-0.2911
C21orf45	-0.499753	-0.281298	-3.87207	0.00063025	0.0420469	-0.292119
TJP2	0.31472	-0.151446	3.87169	0.00063088	0.0420469	-0.293014
AGPAT3	0.437145	0.0483693	3.87026	0.000633251	0.0420469	-0.29638
MKNK2	0.379964	2.71117	3.86938	0.000634719	0.0420469	-0.298456
BPI	0.896132	1.08074	3.86894	0.000635443	0.0420469	-0.29948
OR52W1	-0.27846	-0.200437	-3.86851	0.00063616	0.0420469	-0.300491
TRIM58	0.901253	2.11973	3.86837	0.000636396	0.0420469	-0.300824
CCL27	0.368485	-0.26506	3.86735	0.000638089	0.0420469	-0.303207
SH3BP5L	0.550806	1.5711	3.86604	0.000640287	0.0420469	-0.306291
SSH1	0.664524	0.757831	3.86517	0.00064174	0.0420469	-0.308325
SLC27A4	-0.777225	-0.0645214	-3.86467	0.00064258	0.0420469	-0.309499
PIWIL2	0.254091	-0.461656	3.86312	0.000645207	0.0420469	-0.313159
C1orf90	-0.442155	-0.0475265	-3.8599	0.000650666	0.0420469	-0.320716
LOC723972	0.607882	0.511782	3.85793	0.000654016	0.0420469	-0.325323
AKT2	-0.3436	0.371406	-3.85682	0.000655929	0.0420469	-0.327943
DNCL2A	0.476217	1.72198	3.8566	0.000656302	0.0420469	-0.328452
TSPO	0.527134	2.84548	3.85487	0.000659286	0.0420469	-0.332521
SLC7A5	0.510015	1.48199	3.8537	0.000661305	0.0420469	-0.335264
POPDC3	-0.414561	-0.346148	-3.8532	0.000662165	0.0420469	-0.33643
HDGF2	0.408767	1.09189	3.85214	0.000664007	0.0420469	-0.338921
PNLDC1	-0.447539	-0.455746	-3.85122	0.000665614	0.0420469	-0.341089
ZSCAN1	-0.340043	-0.25594	-3.85063	0.000666637	0.0420469	-0.342467
MAPK12	-0.44275	-0.228864	-3.84984	0.000668021	0.0420469	-0.344327
LOC653101	-0.518059	0.187742	-3.8449	0.000676701	0.0424499	-0.355906
AKAP10	0.46062	0.529175	3.84298	0.000680113	0.0425207	-0.360416
BIN2	0.575426	0.471965	3.84094	0.000683753	0.0426018	-0.365204
IGSF8	-0.247744	-0.0788031	-3.83879	0.000687609	0.0426018	-0.370247
AZU1	1.02227	0.684347	3.83778	0.000689418	0.0426018	-0.372603
TRAK1	0.335878	0.959259	3.83574	0.000693099	0.0426018	-0.377379
PGD	0.625131	3.16922	3.83548	0.000693579	0.0426018	-0.378001
CHRNB2	0.38338	-0.664964	3.83462	0.00069513	0.0426018	-0.380003
FTHL3	0.405191	2.58942	3.82844	0.000706459	0.0431542	-0.394501
PBOV1	-0.333628	-0.203301	-3.82507	0.0007127	0.0432681	-0.402388
AVIL	0.341129	0.364447	3.81814	0.000725719	0.0432681	-0.418619
KIN	0.317288	-0.217868	3.81676	0.000728345	0.0432681	-0.421858
SHARPIN	0.558968	1.28346	3.81391	0.000733794	0.0432681	-0.42854
LILRA4	-0.629148	0.0564444	-3.81378	0.000734036	0.0432681	-0.428836
TEAD1	-0.40052	-0.0265901	-3.81372	0.000734157	0.0432681	-0.428984
RNPC1	1.08319	2.58525	3.81354	0.000734505	0.0432681	-0.429409
FTHL12	0.794944	3.55571	3.81331	0.000734939	0.0432681	-0.429938
DNASE1L1	0.33704	0.261863	3.81245	0.00073659	0.0432681	-0.43195
VNN3	0.38366	0.989261	3.81202	0.000737408	0.0432681	-0.432946
PAPSS2	0.346232	0.445805	3.81165	0.000738122	0.0432681	-0.433814
CCKAR	0.261743	-0.398524	3.81161	0.000738215	0.0432681	-0.433926
HADHB	0.268781	0.916327	3.81145	0.000738514	0.0432681	-0.434289
BMP7	-0.456077	-0.253645	-3.80855	0.000744135	0.0432706	-0.441088
BMP3	-0.416379	0.0329852	-3.80842	0.000744375	0.0432706	-0.441377
LOXHD1	-0.460263	0.0659891	-3.80783	0.000745525	0.0432706	-0.44276
KCTD2	0.447978	0.400535	3.80576	0.000749562	0.0432764	-0.447602
PIPOX	0.403381	-0.446431	3.80426	0.00075251	0.0432764	-0.451121
NRAP	0.195032	-0.562071	3.80308	0.000754829	0.0432764	-0.45388
CBX7	0.470613	1.91484	3.80304	0.000754915	0.0432764	-0.453981
PHLDA3	-0.276376	-0.363829	-3.80134	0.000758273	0.0432794	-0.45796
C16orf35	0.379432	1.37632	3.7979	0.000765107	0.0432794	-0.466004
AMFR	0.446257	1.01669	3.79731	0.000766279	0.0432794	-0.467376
CREB3	-0.522592	0.236422	-3.79722	0.000766463	0.0432794	-0.467591
PHOSPHO1	0.530023	1.83998	3.79534	0.000770235	0.0432794	-0.471992
ADORA2A	0.563191	1.6785	3.79326	0.000774427	0.0432794	-0.476857
LIN28B	-0.509665	-0.237489	-3.79179	0.000777389	0.0432794	-0.48028
NALP12	0.390029	1.37586	3.78946	0.00078213	0.0432794	-0.48573
FKBP3	0.349028	1.07655	3.78741	0.00078633	0.0432794	-0.49053
PPP1R9B	0.291089	0.203844	3.78622	0.000788777	0.0432794	-0.493314
RP13-11B7.1	-0.716436	-0.137978	-3.78604	0.000789137	0.0432794	-0.493724
PRNPIP	-0.492588	0.0900718	-3.78311	0.000795196	0.0432794	-0.50058
PTGS1	0.331517	1.32427	3.7828	0.000795834	0.0432794	-0.501299
IFNK	-0.460416	-0.366421	-3.78213	0.000797219	0.0432794	-0.502856
FLJ45337	0.394196	1.49805	3.78171	0.000798107	0.0432794	-0.503854
TNS1	0.6761	2.15646	3.78136	0.000798837	0.0432794	-0.504674
S100A12	0.442038	2.51953	3.78045	0.000800723	0.0432794	-0.506788
LGI4	-0.682665	-0.111437	-3.78044	0.00080074	0.0432794	-0.506807
HOXD11	-0.545698	0.0502395	-3.7792	0.000803329	0.0432794	-0.5097
TOR1AIP2	-0.268736	-0.10603	-3.7789	0.00080397	0.0432794	-0.510414
LOC200312	0.379466	-0.460311	3.77825	0.000805332	0.0432794	-0.511931
ZNF366	-0.459899	0.0618248	-3.77718	0.000807585	0.0432794	-0.514435
GRK7	-0.47967	-0.580648	-3.77451	0.000813216	0.0432794	-0.520663
PIGW	-0.306303	-0.260728	-3.77427	0.000813719	0.0432794	-0.521217
MYEF2	-0.614266	-0.0978755	-3.77343	0.00081551	0.0432794	-0.523187
OR9G9	0.308702	-0.438079	3.77244	0.000817605	0.0432794	-0.525486
HIST1H4F	0.336841	-0.359338	3.77045	0.000821876	0.0432794	-0.530156
HEXIM1	-0.258118	0.0299344	-3.77017	0.000822464	0.0432794	-0.530797
CRISP3	0.329352	-0.369866	3.76591	0.000831633	0.0432794	-0.540732
PA2G4P4	-0.541796	-0.138547	-3.76562	0.000832271	0.0432794	-0.541418
KCTD16	-0.35692	-0.495843	-3.76362	0.00083662	0.0432794	-0.54609
FLJ21839	0.375424	0.470597	3.76285	0.000838301	0.0432794	-0.547888
DUSP16	0.234875	0.378071	3.76057	0.000843285	0.0432794	-0.5532
PRSS22	-0.40833	-0.123655	-3.75963	0.000845351	0.0432794	-0.555392
HERC1	0.368719	1.8915	3.75925	0.000846199	0.0432794	-0.556291
OR2T4	-0.339571	-0.545369	-3.75765	0.00084973	0.0432794	-0.560022
TP53BP1	0.524824	0.759059	3.75698	0.000851207	0.0432794	-0.561578
RSC1A1	0.462977	0.371752	3.7562	0.000852941	0.0432794	-0.563401
KCNK9	-0.311733	-0.164066	-3.75576	0.000853926	0.0432794	-0.564435
HIST2H2BE	0.419662	1.79518	3.75562	0.000854231	0.0432794	-0.564755
THBS1	0.508619	0.682496	3.75486	0.000855922	0.0432794	-0.566528
SOCS6	-0.459755	-0.131937	-3.75442	0.000856903	0.0432794	-0.567554
SLC14A2	0.318612	-0.0600274	3.75343	0.000859113	0.0432794	-0.569862
ZNF454	-0.565849	-0.0788393	-3.75053	0.000865632	0.0432794	-0.576635
OACT2	0.266285	0.1149	3.74966	0.000867591	0.0432794	-0.57866
PCBP2	0.250658	4.06015	3.74789	0.000871583	0.0432794	-0.582773
KLF7	-0.273951	-0.104039	-3.74777	0.000871854	0.0432794	-0.583052
CSF3R	0.457344	3.5591	3.74731	0.000872909	0.0432794	-0.584135
LOC388931	0.32498	-0.0580656	3.74684	0.000873978	0.0432794	-0.585232
PRAMEF4	-0.427075	-0.279631	-3.74663	0.000874443	0.0432794	-0.585708
PXK	0.355768	0.290508	3.74591	0.000876094	0.0432794	-0.587398
CEBPA	0.446822	2.00283	3.74536	0.000877348	0.0432794	-0.58868
LYL1	0.388044	4.22485	3.74504	0.000878086	0.0432794	-0.589433
PRPSAP2	0.323374	1.4491	3.74116	0.000886985	0.043323	-0.598466
WNK2	0.276048	-0.439518	3.74091	0.000887554	0.043323	-0.599041
PYGL	0.37863	2.4593	3.74001	0.000889632	0.043323	-0.601136
OR7G1	-0.367074	-0.157427	-3.73945	0.000890935	0.043323	-0.602446
FOXG1B	-0.593001	-0.12091	-3.73938	0.000891109	0.043323	-0.602621
ZNF460	-0.310246	-0.306571	-3.7384	0.000893376	0.043323	-0.604898
MAGEA11	-0.348518	-0.324252	-3.7357	0.000899663	0.043323	-0.61118
C22orf13	0.400976	3.65471	3.73402	0.000903609	0.043323	-0.615101
SIAH2	0.4324	1.49577	3.73387	0.000903958	0.043323	-0.615447
CCS	0.352061	1.27608	3.7337	0.000904362	0.043323	-0.615846
TEKT2	0.322639	0.0261339	3.73286	0.000906342	0.043323	-0.617806
LOC653417	-0.490452	-0.0236409	-3.73126	0.000910113	0.043323	-0.621525
SOX6	0.264247	-0.384968	3.73072	0.000911398	0.043323	-0.622789
CGI-69	0.387353	5.33791	3.72949	0.000914308	0.043323	-0.625644
CEACAM6	0.999896	0.855345	3.72912	0.0009152	0.043323	-0.626517
MXI1	0.427791	0.218969	3.72871	0.000916175	0.043323	-0.627472
TMCO3	0.486116	1.1646	3.72704	0.000920147	0.0434006	-0.631346
FAM104A	0.435314	3.26757	3.72537	0.000924155	0.0434473	-0.635239
FBXL17	-0.39683	0.0922666	-3.72461	0.000925996	0.0434473	-0.637022
CEMP1	-0.589923	0.0861048	-3.72317	0.000929455	0.0434473	-0.640361
AP3B2	-0.338487	-0.400843	-3.72195	0.000932402	0.0434473	-0.643196
LOC493829	-0.40369	-0.25817	-3.72133	0.0009339	0.0434473	-0.644634
ARMCX6	0.403758	0.926933	3.72083	0.000935127	0.0434473	-0.64581
OR8K3	-0.367188	-0.359317	-3.71705	0.000944357	0.043767	-0.654607
DYNC1I2	0.435678	1.23696	3.7155	0.000948164	0.0438343	-0.65821
KCNA7	-0.531193	-0.287687	-3.71124	0.000958722	0.0438391	-0.668127
RFC2	0.314509	0.193142	3.71107	0.000959147	0.0438391	-0.668524
NFAM1	-0.482867	0.203906	-3.7091	0.000964059	0.0438391	-0.673098
OR8K1	0.292272	-0.504786	3.70858	0.000965369	0.0438391	-0.674314
TMEM8	0.559119	1.95258	3.7072	0.000968831	0.0438391	-0.67752
C19orf35	0.394634	0.50872	3.70667	0.000970147	0.0438391	-0.678735
LASS2	0.351829	1.70415	3.70615	0.000971458	0.0438391	-0.679944
DPT	-0.408029	-0.271265	-3.70573	0.000972524	0.0438391	-0.680926
NP	0.337762	2.09425	3.70557	0.000972942	0.0438391	-0.681311
TREX2	-0.282234	-0.276907	-3.70536	0.000973455	0.0438391	-0.681783
APOL4	-0.292442	-0.178061	-3.70427	0.000976229	0.0438391	-0.684332
ZNF343	-0.489187	-0.0626858	-3.70416	0.000976503	0.0438391	-0.684582
LGR6	-0.319879	-0.222544	-3.70286	0.000979796	0.0438812	-0.687597
ENSA	0.385347	0.253225	3.7016	0.000983019	0.04392	-0.690538
ASB8	0.340933	1.41902	3.69701	0.000994786	0.0443359	-0.701192
CYP27A1	0.727369	2.03252	3.6949	0.00100025	0.0443359	-0.706094
GML	-0.525023	-0.128468	-3.69383	0.00100301	0.0443359	-0.708568
C20orf151	-0.502043	-0.173442	-3.69239	0.00100677	0.0443359	-0.711913
FBXO7	0.717389	2.03527	3.69199	0.00100783	0.0443359	-0.712859
ZBED2	0.45132	-0.570303	3.69176	0.00100844	0.0443359	-0.713393
CSPG2	0.432979	2.72232	3.69155	0.00100899	0.0443359	-0.713882
NACAP1	0.445833	0.61218	3.6893	0.00101489	0.0444902	-0.719102
SLCO1B1	0.288766	-0.662434	3.68397	0.001029	0.0447603	-0.73147
NKAP	0.370659	-0.338456	3.68261	0.00103264	0.0447603	-0.734626
HMOX2	-0.543794	0.00172192	-3.68254	0.00103284	0.0447603	-0.7348
FLJ10006	0.407753	1.33571	3.68172	0.00103502	0.0447603	-0.736687
C12orf43	0.332158	0.601328	3.68168	0.00103513	0.0447603	-0.73678
GPR75	0.279533	-0.479001	3.68011	0.00103934	0.0447603	-0.74042
CITED2	0.345613	1.60652	3.67997	0.00103973	0.0447603	-0.740756
LOC654052	0.417763	0.46785	3.6791	0.00104209	0.0447603	-0.742778
REG4	0.317863	-0.226201	3.67725	0.00104708	0.0447603	-0.74706
SNX25	0.461607	0.0889755	3.67558	0.00105164	0.0447603	-0.75095
ARHGEF10L	-0.359791	0.0167276	-3.67541	0.00105209	0.0447603	-0.751329
UCHL1	-0.310879	-0.33089	-3.67415	0.00105553	0.0447603	-0.754247
LGI1	0.25765	-0.554686	3.67312	0.00105836	0.0447603	-0.75665
TCEAL5	-0.423884	-0.0876653	-3.67252	0.00106001	0.0447603	-0.758046
HECA	0.3879	1.78856	3.6719	0.0010617	0.0447603	-0.759466
FBXO46	0.411332	0.637672	3.67143	0.001063	0.0447603	-0.76056
CDCA7L	0.486333	-0.083491	3.67129	0.00106339	0.0447603	-0.760891
ITIH3	-0.632774	-0.114802	-3.67071	0.001065	0.0447603	-0.762242
DNAJB6	0.541746	2.02362	3.67009	0.0010667	0.0447603	-0.76367
OR2L8	-0.403692	-0.379695	-3.66798	0.00107254	0.0448321	-0.768562
LOC402055	0.440608	1.41181	3.66774	0.00107322	0.0448321	-0.769125
MPPED2	0.380375	-0.644364	3.66449	0.00108229	0.0448529	-0.776656
RNF149	0.569593	1.34485	3.66443	0.00108245	0.0448529	-0.776793
FLJ39378	0.378485	0.599464	3.66429	0.00108284	0.0448529	-0.777114
LAMB2	-0.305237	-0.212941	-3.66318	0.00108597	0.0448529	-0.779696
SNCA	0.760167	3.49249	3.6629	0.00108675	0.0448529	-0.780337
ARHGAP9	0.46402	3.03625	3.6624	0.00108816	0.0448529	-0.781501
FRY	0.318589	0.200259	3.65995	0.00109508	0.0449061	-0.787174
LOC728643	0.403292	1.3372	3.65894	0.00109793	0.0449061	-0.789501
DEFA4	1.10743	1.56382	3.65857	0.00109899	0.0449061	-0.790366
OR52D1	-0.239267	0.0458305	-3.6584	0.00109947	0.0449061	-0.790756
RPS26L1	-0.52985	-0.463946	-3.65769	0.0011015	0.0449061	-0.792406
CASP6	0.263038	0.279662	3.65186	0.00111826	0.0453995	-0.805916
OR2W3	0.79045	1.06497	3.65178	0.00111848	0.0453995	-0.806092
ANKRD9	0.458336	1.72877	3.64715	0.00113196	0.045643	-0.816817
CSMD2	-0.514029	-0.122264	-3.64663	0.00113348	0.045643	-0.818016
TRIM62	-0.552011	0.165138	-3.64578	0.00113597	0.045643	-0.819978
TMCO5	-0.764014	-0.0865482	-3.64445	0.00113988	0.045643	-0.823052
TAB3	0.24166	-0.171361	3.64415	0.00114077	0.045643	-0.823753
FLJ10986	0.279309	0.676324	3.64374	0.00114198	0.045643	-0.824699
FLJ13910	0.306044	0.434907	3.64251	0.00114562	0.045643	-0.827547
IL17R	0.513846	1.95483	3.64189	0.00114747	0.045643	-0.828991
RGC32	0.433808	2.55948	3.64162	0.00114828	0.045643	-0.829616
DAPK1	0.405796	0.76943	3.64059	0.00115134	0.045643	-0.831999
OR10K2	0.367865	-0.706763	3.64009	0.00115281	0.045643	-0.833144
ATP1A1	0.573514	1.8331	3.63974	0.00115387	0.045643	-0.833968
OGFRL1	0.654368	0.776334	3.63439	0.00116993	0.0459483	-0.846327
SLC2A14	0.488486	0.366812	3.63427	0.00117029	0.0459483	-0.846608
C10orf26	0.90476	1.18953	3.63396	0.00117123	0.0459483	-0.847325
OR2T1	-0.524406	-0.0265036	-3.63389	0.00117146	0.0459483	-0.847498
LHFPL1	-0.742732	0.0114168	-3.63211	0.00117684	0.0459666	-0.851596
MT1M	-0.380942	-0.420585	-3.63211	0.00117686	0.0459666	-0.851614
TXN	0.35013	2.69796	3.63075	0.00118099	0.0460313	-0.854745
A2ML1	0.516385	-0.583069	3.62883	0.00118685	0.0460559	-0.859177
TBC1D22A	0.341548	0.22763	3.62782	0.00118998	0.0460559	-0.86153
CDX2	0.250002	-0.365014	3.62781	0.00119	0.0460559	-0.861543
BRRN1	-0.530499	0.0182376	-3.62732	0.00119151	0.0460559	-0.862676
TBXA2R	-0.349266	-0.223014	-3.62639	0.00119438	0.0460713	-0.864829
HP1BP3	0.323668	0.34662	3.6248	0.00119928	0.0461471	-0.868492
ECOP	0.675732	0.685015	3.62415	0.0012013	0.0461471	-0.869997
LOC653686	0.619725	-0.741269	3.62287	0.00120527	0.0461998	-0.872947
PTPLA	0.264193	0.41082	3.62119	0.00121053	0.0461998	-0.876848
MALAT1	-0.333357	-0.281534	-3.62061	0.00121233	0.0461998	-0.87817
EIF1	0.2904	3.32342	3.62024	0.00121348	0.0461998	-0.879023
LKAP	0.505327	3.46839	3.6197	0.00121518	0.0461998	-0.880274
CDC2L1	0.246008	-0.507677	3.61635	0.00122576	0.0461998	-0.888023
LYG2	-0.423482	-0.355944	-3.61602	0.00122678	0.0461998	-0.888774
ZCCHC10	0.288922	-0.448027	3.61584	0.00122736	0.0461998	-0.889195
SNN	0.309422	1.30119	3.61523	0.00122929	0.0461998	-0.890596
FLJ43855	0.515957	1.13029	3.61446	0.00123175	0.0461998	-0.892385
TARS	0.374673	1.12705	3.61385	0.00123369	0.0461998	-0.893791
RNASE4	0.275902	0.194189	3.61375	0.00123401	0.0461998	-0.894022
ZNF257	0.312451	-0.549087	3.61347	0.0012349	0.0461998	-0.894673
ASGR2	0.276423	0.570415	3.61226	0.00123876	0.046251	-0.897459
FGF4	-0.530304	-0.364097	-3.60788	0.00125284	0.0466823	-0.907567
FURIN	0.614576	1.4241	3.60705	0.00125553	0.0466823	-0.909489
DHRS4L2	0.464099	0.776387	3.60601	0.0012589	0.0466823	-0.911885
GABARAPL2	0.31087	0.887104	3.60516	0.00126166	0.0466823	-0.91384
GSN	0.416613	0.37769	3.6048	0.00126283	0.0466823	-0.914673
C4orf36	0.304883	-0.383739	3.60035	0.00127742	0.0470834	-0.92494
ARID3A	0.363108	2.47464	3.59995	0.00127874	0.0470834	-0.925865
TXNRD1	0.475267	1.04745	3.59796	0.00128533	0.0472326	-0.930459
C1orf43	0.357021	1.07618	3.59522	0.00129442	0.0473193	-0.936764
C3orf62	0.360741	0.956299	3.5946	0.0012965	0.0473193	-0.938195
CALML5	-0.514899	-0.000971871	-3.59429	0.00129754	0.0473193	-0.938913
SOD2	0.442359	2.20242	3.59346	0.00130031	0.0473193	-0.940823
NDRG3	0.275306	1.13517	3.59344	0.00130039	0.0473193	-0.940872
PROK2	0.581456	3.50884	3.59105	0.00130841	0.0475185	-0.946371
CXXC4	-0.517518	0.186041	-3.58698	0.00132221	0.0479261	-0.955748
CASC3	0.79588	2.03543	3.58355	0.00133395	0.0482581	-0.963656
NRP1	-0.233234	-0.297693	-3.58044	0.00134467	0.0484105	-0.970804
C4A	-0.456016	0.0429247	-3.58	0.0013462	0.0484105	-0.971821
PCDHGB2	0.257549	-0.388361	3.57906	0.00134946	0.0484105	-0.973986
HPS1	0.418181	1.25277	3.57858	0.00135115	0.0484105	-0.975104
UBE2C	0.232389	0.0135058	3.57742	0.00135517	0.0484105	-0.977761
AMOTL2	-0.485435	0.0183116	-3.57719	0.00135598	0.0484105	-0.978296
HOMER2	0.367013	0.333546	3.57641	0.00135871	0.0484105	-0.980091
DNAJB1	0.5875	1.49305	3.57602	0.00136008	0.0484105	-0.980988
PBX1	0.380745	0.766234	3.5756	0.00136155	0.0484105	-0.981958
JMJD2A	0.402894	0.0914416	3.57328	0.00136971	0.0484381	-0.987298
TIGD3	-0.445908	-0.015306	-3.57305	0.00137051	0.0484381	-0.987817
KCNE1L	0.251814	-0.154329	3.57256	0.00137224	0.0484381	-0.988947
HSPA1A	0.422685	3.42752	3.57161	0.00137559	0.0484381	-0.991128
GHSR	-0.229336	-0.324842	-3.57041	0.00137985	0.0484381	-0.993889
LOC144097	-0.593335	-0.00786375	-3.57031	0.00138021	0.0484381	-0.994119
HIST1H2AB	-0.40895	-0.344617	-3.57022	0.00138053	0.0484381	-0.994328
LY6G6C	-0.637658	-0.0576855	-3.56934	0.00138368	0.0484573	-0.996365
ANP32E	-0.522668	-0.239838	-3.56846	0.0013868	0.0484625	-0.99838
AMD1	0.572881	1.95014	3.56616	0.00139503	0.0484625	-1.00367
MGC42090	0.350134	-0.389178	3.56405	0.00140263	0.0484625	-1.00852
C16orf3	-0.25461	-0.176911	-3.56331	0.0014053	0.0484625	-1.01022
ORF1-FL49	0.376104	1.68289	3.56322	0.00140562	0.0484625	-1.01042
ATCAY	-0.286617	-0.109643	-3.56181	0.00141073	0.0484625	-1.01367
TSPAN9	0.456403	1.74745	3.56117	0.00141307	0.0484625	-1.01514
OR52N4	0.300176	-0.520346	3.56041	0.00141584	0.0484625	-1.0169
SLC1A2	-0.547155	-0.0741748	-3.55946	0.00141928	0.0484625	-1.01907
DUSP22	0.371594	1.3983	3.55901	0.00142093	0.0484625	-1.02011
GP1BA	0.29826	0.954714	3.55591	0.00143232	0.0484625	-1.02724
AFTIPHILIN	0.265697	0.375266	3.55585	0.00143253	0.0484625	-1.02737
SERPINB8	0.456316	0.660455	3.55577	0.00143283	0.0484625	-1.02755
REV3L	0.475686	0.00571089	3.55568	0.00143317	0.0484625	-1.02777
PTCH2	-0.347083	-0.213016	-3.55316	0.00144246	0.0484625	-1.03354
FLJ44060	0.301151	-0.537233	3.55291	0.00144339	0.0484625	-1.03412
UGP2	0.372142	1.10215	3.55238	0.00144538	0.0484625	-1.03535
SESN3	0.490881	2.49424	3.55127	0.00144948	0.0484625	-1.03788
INSM2	0.261742	-0.422207	3.55076	0.0014514	0.0484625	-1.03906
PTPN20B	0.387357	-0.628609	3.54953	0.001456	0.0484625	-1.04189
FLJ36046	0.357132	-0.191259	3.5487	0.00145912	0.0484625	-1.0438
MOBKL1A	-0.458992	-0.0226442	-3.54844	0.00146007	0.0484625	-1.04438
YOD1	0.331055	-0.553885	3.54831	0.00146057	0.0484625	-1.04469
NUMBL	-0.649214	-0.00556193	-3.54825	0.00146079	0.0484625	-1.04482
CHGA	0.251417	-0.143774	3.54815	0.00146117	0.0484625	-1.04506
K6IRS4	-0.448955	-0.472135	-3.54713	0.00146499	0.0484625	-1.04739
EID3	-0.26994	0.12632	-3.54709	0.00146517	0.0484625	-1.04749
EIF4EBP2	0.562769	2.05982	3.54655	0.00146721	0.0484625	-1.04874
OSCAR	0.400903	2.21672	3.5456	0.00147078	0.0484625	-1.05091
BRSK2	-0.484451	-0.161029	-3.54518	0.00147238	0.0484625	-1.05188
C11orf51	0.375944	0.650503	3.54499	0.00147308	0.0484625	-1.05231
NOL3	-0.226325	0.0220134	-3.54384	0.00147744	0.0484625	-1.05495
TRADD	0.461972	1.1996	3.54378	0.00147767	0.0484625	-1.05508
KRCC1	0.493602	0.956136	3.54286	0.00148117	0.0484625	-1.0572
PGM1	0.366906	2.25629	3.54279	0.00148143	0.0484625	-1.05735
FOXF1	-0.389128	-0.178728	-3.54098	0.00148832	0.0484625	-1.0615
CTSD	0.520089	2.35113	3.54071	0.00148937	0.0484625	-1.06213
BCL7A	-0.376324	-0.214817	-3.53987	0.00149258	0.0484625	-1.06405
PAK2	0.430926	1.70134	3.53967	0.00149335	0.0484625	-1.06451
SRRM2	-0.262712	3.33033	-3.53912	0.00149548	0.0484625	-1.06578
MDFI	-0.862171	-0.0268294	-3.53906	0.00149568	0.0484625	-1.06591
PEG10	-0.461253	-0.267594	-3.53867	0.0014972	0.0484625	-1.06682
TFDP1	0.436717	1.86318	3.53844	0.00149808	0.0484625	-1.06734
EN2	-0.51823	-0.171861	-3.53839	0.00149828	0.0484625	-1.06745
TSC22D1	0.430977	0.45894	3.53629	0.00150637	0.0485012	-1.07227
AADACL2	0.248108	-0.462529	3.53622	0.00150666	0.0485012	-1.07244
LIMK2	0.410099	0.285081	3.53493	0.00151165	0.0485012	-1.07539
CYB5R4	0.492579	1.7071	3.53479	0.00151217	0.0485012	-1.0757
LOC647141	-0.318311	-0.455346	-3.53416	0.00151464	0.0485012	-1.07715
NCOA3	-0.240328	1.13904	-3.53277	0.00152007	0.0485012	-1.08035
SIGLEC5	0.41597	1.38468	3.53171	0.00152421	0.0485012	-1.08278
TACSTD1	-0.497731	0.0867903	-3.53048	0.00152902	0.0485012	-1.08559
PTH	-0.632437	-0.546969	-3.52942	0.00153317	0.0485012	-1.08802
SH3BP2	0.420131	0.231418	3.52937	0.00153339	0.0485012	-1.08815
LOC653131	0.221244	-0.21996	3.52935	0.00153347	0.0485012	-1.08819
BAIAP2L1	-0.326688	-0.455359	-3.52925	0.00153387	0.0485012	-1.08842
HSD17B6	0.353886	-0.480873	3.52918	0.00153411	0.0485012	-1.08856
ACTR3	0.366197	2.14862	3.52872	0.00153592	0.0485012	-1.08962
GIT2	0.606151	0.822996	3.52761	0.00154032	0.0485165	-1.09217
RBM23	0.428787	2.4598	3.52702	0.00154265	0.0485165	-1.09352
CSRP3	0.253106	-0.574967	3.52625	0.00154571	0.0485165	-1.09529
NUP153	0.39166	1.05959	3.52597	0.00154682	0.0485165	-1.09593
BCL7B	0.342612	0.990019	3.52506	0.00155043	0.0485479	-1.09801
HISPPD1	0.238855	-0.46306	3.51937	0.00157324	0.0487742	-1.11106
GNAZ	-0.419915	0.000881544	-3.51896	0.00157487	0.0487742	-1.11198
MADD	0.293869	0.707393	3.51839	0.0015772	0.0487742	-1.1133
NCF1B	0.755891	1.20494	3.51784	0.00157943	0.0487742	-1.11456
FXC1	0.279868	0.8295	3.51703	0.00158268	0.0487742	-1.1164
FCGR3B	0.317287	2.53283	3.51632	0.00158558	0.0487742	-1.11803
HIST3H2A	0.579729	0.880529	3.51612	0.00158638	0.0487742	-1.11848
ECE1	0.425119	0.279714	3.51538	0.0015894	0.0487742	-1.12018
TMEM16F	0.376909	1.58475	3.51465	0.0015924	0.0487742	-1.12186
CETN2	0.274759	2.24279	3.51431	0.00159376	0.0487742	-1.12263
PTGFRN	-0.508444	-0.437173	-3.51411	0.00159458	0.0487742	-1.12308
PLAC4	-0.280567	-0.219788	-3.5139	0.00159546	0.0487742	-1.12358
PCDH15	0.301925	-0.423647	3.51335	0.00159769	0.0487742	-1.12482
OACT5	0.264381	1.13316	3.51286	0.00159971	0.0487742	-1.12595
NBPF10	0.803195	3.61983	3.51268	0.00160046	0.0487742	-1.12637
CRSP7	0.435993	0.413912	3.51089	0.00160781	0.0487742	-1.13046
RFXANK	0.366524	1.2713	3.51076	0.00160835	0.0487742	-1.13076
CDC34	0.783226	2.23124	3.51069	0.00160863	0.0487742	-1.13092
CNOT10	0.294017	1.02861	3.51054	0.00160928	0.0487742	-1.13127
ARHGEF16	-0.554872	-0.169074	-3.51036	0.00161001	0.0487742	-1.13168
SEC23B	0.323013	1.75214	3.50925	0.00161457	0.0488327	-1.1342
THSD3	-0.231452	-0.289332	-3.50787	0.00162028	0.0488467	-1.13736
YWHAB	0.33159	2.28781	3.5074	0.00162226	0.0488467	-1.13845
LETM2	0.242094	-0.0426551	3.50683	0.00162462	0.0488467	-1.13975
PARL	0.367926	1.62057	3.50573	0.00162923	0.0488467	-1.14228
CYP11B2	-0.28145	-0.10737	-3.50523	0.00163131	0.0488467	-1.14342
CCM2	0.454831	1.38567	3.50443	0.00163465	0.0488467	-1.14524
NCR1	-0.373295	-0.0267636	-3.5043	0.00163519	0.0488467	-1.14554
ARFGAP3	-0.311321	-0.286962	-3.50309	0.00164029	0.0488467	-1.14832
SH3BGR	-0.253554	-0.015165	-3.50271	0.00164187	0.0488467	-1.14917
CR1	0.578484	0.376428	3.50261	0.00164227	0.0488467	-1.14939
CSNK2A1P	0.367333	0.372635	3.50212	0.00164435	0.0488467	-1.15052
CES4	0.403226	-0.266859	3.50151	0.00164692	0.0488467	-1.15192
SRP14P1	0.576832	2.19085	3.50099	0.00164911	0.0488467	-1.1531
IDI1	0.430232	0.527429	3.49969	0.0016546	0.0488606	-1.15607
UXS1	-0.62833	0.286365	-3.49934	0.0016561	0.0488606	-1.15688
C20orf28	-0.477133	-0.0228382	-3.49902	0.00165745	0.0488606	-1.1576
Gcom1	0.254074	-0.246727	3.49688	0.00166656	0.0489894	-1.1625
SLC28A1	-0.30381	-0.15465	-3.4961	0.0016699	0.0489894	-1.16429
EIF4E3	0.342135	2.194	3.49563	0.00167191	0.0489894	-1.16536
CREG2	-0.2853	-0.267989	-3.49553	0.00167233	0.0489894	-1.16558
MRFAP1	0.458246	2.80196	3.49422	0.00167798	0.0490775	-1.16859
FLJ39779	-0.355234	0.262294	-3.49246	0.00168554	0.0492118	-1.17261
ARMC8	0.309898	-0.0410392	3.49192	0.00168785	0.0492118	-1.17383
GDF11	-0.560849	0.0445675	-3.48921	0.00169961	0.0492974	-1.18002
MMAA	-0.286029	-0.117275	-3.48904	0.00170036	0.0492974	-1.18042
ARRDC1	0.437631	0.453002	3.48902	0.00170047	0.0492974	-1.18047
ROPN1L	0.46887	1.33642	3.48881	0.00170137	0.0492974	-1.18095
LMNB1	0.40353	0.982313	3.48819	0.00170406	0.0492986	-1.18236
KCNAB3	0.310072	-0.0875868	3.48655	0.00171124	0.0494152	-1.18611
ACADSB	0.302516	-0.175271	3.48367	0.00172387	0.0494152	-1.19267
CREBL2	-0.379788	-0.0453005	-3.48211	0.00173078	0.0494152	-1.19624
POLE	0.33756	0.586801	3.48169	0.00173265	0.0494152	-1.1972
FAM107A	-0.512653	-0.24653	-3.48162	0.00173294	0.0494152	-1.19735
MYO1C	0.268728	-0.31815	3.48087	0.00173625	0.0494152	-1.19906
SLC35A2	0.232645	0.466496	3.4807	0.00173704	0.0494152	-1.19946
DGCR14	0.407424	0.658056	3.48038	0.00173846	0.0494152	-1.20019
ABI3BP	-0.494014	-0.111463	-3.48021	0.00173919	0.0494152	-1.20057
TMEM54	0.330828	-0.406128	3.4787	0.00174593	0.0494152	-1.20402
XPC	0.275087	2.23837	3.47866	0.00174611	0.0494152	-1.20411
SNRPD3	0.553495	0.8689	3.47856	0.00174658	0.0494152	-1.20435
MAML1	0.314168	0.228519	3.47793	0.00174936	0.0494152	-1.20577
MYOD1	0.285531	-0.329587	3.47792	0.00174943	0.0494152	-1.20581
CYP26B1	-0.322899	-0.127136	-3.47773	0.00175028	0.0494152	-1.20623
STAU	0.295063	0.731347	3.47709	0.00175315	0.0494152	-1.2077
TPM1	0.376196	0.753375	3.47599	0.00175807	0.0494152	-1.2102
MCTP2	0.615531	0.116895	3.47594	0.00175831	0.0494152	-1.21032
EMP2	-0.468359	0.0340036	-3.47454	0.0017646	0.0494152	-1.21351
HMHA1	0.33683	1.97698	3.47448	0.00176489	0.0494152	-1.21365
U2AF1	0.560976	0.993682	3.47422	0.00176607	0.0494152	-1.21425
POLL	0.432786	0.790179	3.47357	0.001769	0.0494152	-1.21573
C9orf37	-0.446833	0.00613141	-3.47355	0.00176909	0.0494152	-1.21577
ALS2CR15	0.289666	-0.446969	3.47181	0.00177698	0.0494895	-1.21974
ACTN1	0.311329	3.79582	3.47158	0.00177802	0.0494895	-1.22027
PFKFB3	0.410268	2.1879	3.4712	0.00177972	0.0494895	-1.22112
RAB1B	0.329272	0.891997	3.46922	0.00178877	0.0496045	-1.22564
ELA2	0.932583	1.58563	3.46847	0.00179218	0.0496045	-1.22734
CLDN3	-0.408162	-0.234254	-3.46779	0.00179531	0.0496045	-1.2289
NMNAT1	0.346786	0.167602	3.46755	0.00179642	0.0496045	-1.22945
MNAB	0.224589	0.709842	3.46739	0.00179717	0.0496045	-1.22982
KRTAP17-1	-0.328192	-0.298319	-3.4668	0.00179984	0.0496048	-1.23115
CHAC1	-0.290973	-0.14719	-3.4661	0.00180308	0.0496205	-1.23275
POU5F1	0.313082	-0.568599	3.46552	0.00180577	0.0496214	-1.23408
ALDH1L2	-0.528169	-0.101674	-3.46447	0.00181059	0.0496807	-1.23646
NAP1L4	0.492056	2.86775	3.46285	0.00181813	0.0497275	-1.24016
CUL4B	0.263733	0.502818	3.46262	0.00181919	0.0497275	-1.24069
OR51B6	-0.38424	-0.404167	-3.46211	0.00182154	0.0497275	-1.24184
TAF1	0.354648	0.205919	3.4618	0.00182298	0.0497275	-1.24254
PRKCB1	0.355702	1.8912	3.46027	0.00183012	0.0497642	-1.24603
KCNK15	-0.522255	-0.0998792	-3.4599	0.00183188	0.0497642	-1.24689
FLJ21908	-0.26647	-0.411667	-3.4594	0.0018342	0.0497642	-1.24801
DNAJC7	0.531701	1.31507	3.45914	0.00183541	0.0497642	-1.2486
TMED2	0.456295	1.43542	3.45774	0.00184201	0.0497642	-1.2518
FLJ36004	-0.305285	-0.576289	-3.45685	0.0018462	0.0497642	-1.25383
SNORD56	0.349973	0.695151	3.45669	0.00184696	0.0497642	-1.2542
ARPC1B	0.95562	2.13703	3.45623	0.00184911	0.0497642	-1.25523
CFHR1	-0.363442	-0.208157	-3.45606	0.00184991	0.0497642	-1.25562
APLP2	0.412447	-0.463139	3.45532	0.0018534	0.0497642	-1.2573
LY6K	0.278382	-0.440954	3.45526	0.0018537	0.0497642	-1.25745
PPBP	0.56601	2.26356	3.45366	0.00186127	0.0498647	-1.26108
GRB2	0.608093	1.942	3.45321	0.00186343	0.0498647	-1.26212
PINK1	0.391658	1.51794	3.45273	0.00186572	0.0498647	-1.26321
CER1	0.266046	-0.408464	3.45155	0.00187135	0.0498647	-1.2659
STARD10	0.63673	1.38763	3.4512	0.00187301	0.0498647	-1.26669
SPIN2	0.257493	-0.380427	3.4511	0.00187351	0.0498647	-1.26692
NNMT	0.335254	0.639491	3.44966	0.00188038	0.0499	-1.27019
LGALS7	-0.461525	-0.133242	-3.44918	0.0018827	0.0499	-1.27129
ALPL	0.579395	3.80044	3.44851	0.00188591	0.0499	-1.27281
FAM21C	0.350103	0.0324363	3.44805	0.00188813	0.0499	-1.27386
UCN	-0.278056	-0.0432854	-3.44803	0.00188823	0.0499	-1.2739
