# Supplementary material for: Identification of Perturbed Pathways Rendering Susceptibility to Tuberculosis in Type 2 Diabetes Mellitus Patients Using BioNSi Simulation of Integrated Network of Implicated Human Genes
Source: Research Square preprint supplement (doi:10.21203/rs.3.rs-863821/v1), 2021-09-03
Supplement: Supplementary file 4 [file 08e4c13bbfc9c7227f8cd565.xlsx]

## Sheet: STRING pathways
#term ID	term description	observed gene count	background gene count	false discovery rate	matching proteins in your network (labels)
hsa04060	Cytokine-cytokine receptor interaction	18	263	1.29e-09	CCL1,CCL2,CCL5,IFNG,IL10,IL17A,IL17F,IL18,IL1B,IL2,IL20,IL22,IL5,IL6,PPBP,TGFB1,TNF,TNFRSF10A
hsa04657	IL-17 signaling pathway	12	92	2.36e-09	CCL2,IFNG,IL17A,IL17F,IL1B,IL5,IL6,LCN2,MAPK12,MMP9,TNF,TRADD
hsa04659	Th17 cell differentiation	12	102	4.66e-09	IFNG,IL17A,IL17F,IL1B,IL2,IL22,IL6,MAPK12,RXRA,STAT1,STAT3,TGFB1
hsa04630	Jak-STAT signaling pathway	14	160	5.18e-09	AKT2,BCL2L1,GRB2,IFNG,IL10,IL2,IL20,IL22,IL5,IL6,SOCS1,SOCS3,STAT1,STAT3
hsa04933	AGE-RAGE signaling pathway in diabetic complications	11	98	3.43e-08	AKT2,CCL2,FOXO1,IL1B,IL6,MAPK12,PRKCB,STAT1,STAT3,TGFB1,TNF
hsa04660	T cell receptor signaling pathway	11	99	3.58e-08	AKT2,CD28,GRB2,IFNG,IL10,IL2,IL5,MAPK12,PAK1,PAK2,TNF
hsa04620	Toll-like receptor signaling pathway	11	102	4.54e-08	AKT2,CCL5,CD14,CD86,IL1B,IL6,MAP2K3,MAPK12,STAT1,TLR4,TNF
hsa04668	TNF signaling pathway	11	108	7.49e-08	AKT2,CCL2,CCL5,IL1B,IL6,MAP2K3,MAPK12,MMP9,SOCS3,TNF,TRADD
hsa04940	Type I diabetes mellitus	8	40	7.71e-08	CD28,CD86,GZMB,IFNG,IL1B,IL2,PRF1,TNF
hsa04621	NOD-like receptor signaling pathway	12	166	4.72e-07	BCL2L1,CAMP,CCL2,CCL5,IL18,IL1B,IL6,MAPK12,STAT1,TLR4,TNF,TP53BP1
hsa04931	Insulin resistance	10	107	5.88e-07	AKT2,FOXO1,IL6,IRS1,PRKCB,PTPN1,PYGL,SOCS3,STAT3,TNF
hsa04145	Phagosome	11	145	8.57e-07	CD14,CORO1A,DYNC1I2,FCGR3B,ITGB3,ITGB5,LAMP1,MPO,NCF2,THBS1,TLR4
hsa04217	Necroptosis	11	155	1.55e-06	H2AFZ,HIST3H2A,IFNG,IL1B,PYGL,STAT1,STAT3,TLR4,TNF,TNFRSF10A,TRADD
hsa04672	Intestinal immune network for IgA production	7	44	1.85e-06	CD28,CD86,IL10,IL2,IL5,IL6,TGFB1
hsa04068	FoxO signaling pathway	10	130	2.63e-06	AKT2,FOXO1,GRB2,IL10,IL6,IRS1,MAPK12,SOD2,STAT3,TGFB1
hsa05202	Transcriptional misregulation in cancer	11	169	3.1e-06	BCL2L1,CD14,CD86,ELANE,FOXO1,GZMB,IL6,MMP9,MPO,PBX1,RXRA
hsa04650	Natural killer cell mediated cytotoxicity	9	124	1.35e-05	FCGR3B,GRB2,GZMB,IFNG,PAK1,PRF1,PRKCB,TNF,TNFRSF10A
hsa04010	MAPK signaling pathway	13	293	1.53e-05	AKT2,CD14,GRB2,HSPA1A,IL1B,MAP2K3,MAPK12,PAK1,PAK2,PRKCB,TGFB1,TNF,TRADD
hsa04066	HIF-1 signaling pathway	8	98	2.06e-05	AKT2,HK2,HMOX1,IFNG,IL6,PRKCB,STAT3,TLR4
hsa04910	Insulin signaling pathway	9	134	2.18e-05	AKT2,FOXO1,GRB2,HK2,IRS1,PTPN1,PYGL,SOCS1,SOCS3
hsa04917	Prolactin signaling pathway	7	69	2.18e-05	AKT2,GRB2,MAPK12,SOCS1,SOCS3,STAT1,STAT3
hsa04920	Adipocytokine signaling pathway	7	69	2.18e-05	AKT2,IRS1,RXRA,SOCS3,STAT3,TNF,TRADD
hsa04210	Apoptosis	9	135	2.22e-05	AKT2,BCL2L1,CTSD,GZMB,LMNB1,PRF1,TNF,TNFRSF10A,TRADD
hsa04062	Chemokine signaling pathway	10	181	3.07e-05	AKT2,CCL1,CCL2,CCL5,GRB2,PAK1,PPBP,PRKCB,STAT1,STAT3
hsa04510	Focal adhesion	10	197	6.04e-05	ACTN1,AKT2,GRB2,ITGB3,ITGB5,LAMB2,PAK1,PAK2,PRKCB,THBS1
hsa04151	PI3K-Akt signaling pathway	13	348	7.26e-05	AKT2,BCL2L1,GRB2,IL2,IL6,IRS1,ITGB3,ITGB5,LAMB2,RXRA,THBS1,TLR4,YWHAB
hsa04064	NF-kappa B signaling pathway	7	93	0.00011	BCL2L1,CD14,IL1B,PRKCB,TLR4,TNF,TRADD
hsa04664	Fc epsilon RI signaling pathway	6	67	0.00017	AKT2,GRB2,IL5,MAP2K3,MAPK12,TNF
hsa04930	Type II diabetes mellitus	5	46	0.00031	HK2,IRS1,SOCS1,SOCS3,TNF
hsa01521	EGFR tyrosine kinase inhibitor resistance	6	78	0.00035	AKT2,BCL2L1,GRB2,IL6,PRKCB,STAT3
hsa04919	Thyroid hormone signaling pathway	7	115	0.00036	AKT2,FOXO1,ITGB3,NCOA3,PRKCB,RXRA,STAT1
hsa04666	Fc gamma R-mediated phagocytosis	6	89	0.00064	AKT2,ARF6,ARPC1B,GSN,PAK1,PRKCB
hsa04640	Hematopoietic cell lineage	6	94	0.00084	CD14,IL1B,IL5,IL6,ITGB3,TNF
hsa04213	Longevity regulating pathway - multiple species	5	61	0.00093	AKT2,FOXO1,HSPA1A,IRS1,SOD2
hsa00500	Starch and sucrose metabolism	4	33	0.00098	HK2,PGM1,PYGL,UGP2
hsa04218	Cellular senescence	7	156	0.0018	AKT2,FOXO1,IL6,MAP2K3,MAPK12,TGFB1,ZFP36L1
hsa04810	Regulation of actin cytoskeleton	8	205	0.0018	ACTN1,ARPC1B,CD14,GSN,ITGB3,ITGB5,PAK1,PAK2
hsa04071	Sphingolipid signaling pathway	6	116	0.0021	AKT2,CTSD,MAPK12,PRKCB,TNF,TRADD
hsa03420	Nucleotide excision repair	4	46	0.0027	CUL4B,POLE,RFC2,XPC
hsa04012	ErbB signaling pathway	5	83	0.003	AKT2,GRB2,PAK1,PAK2,PRKCB
hsa04658	Th1 and Th2 cell differentiation	5	88	0.0037	IFNG,IL2,IL5,MAPK12,STAT1
hsa04120	Ubiquitin mediated proteolysis	6	134	0.0038	CDC34,CUL4B,HERC1,SOCS1,SOCS3,UBE2C
hsa04915	Estrogen signaling pathway	6	133	0.0038	AKT2,CTSD,GRB2,HSPA1A,MMP9,NCOA3
hsa04015	Rap1 signaling pathway	7	203	0.0062	AKT2,DRD2,ITGB3,MAP2K3,MAPK12,PRKCB,THBS1
hsa04623	Cytosolic DNA-sensing pathway	4	62	0.0065	CCL5,IL18,IL1B,IL6
hsa00052	Galactose metabolism	3	31	0.0078	HK2,PGM1,UGP2
hsa01523	Antifolate resistance	3	31	0.0078	IL1B,IL6,TNF
hsa04670	Leukocyte transendothelial migration	5	112	0.0086	ACTN1,MAPK12,MMP9,NCF2,PRKCB
hsa04014	Ras signaling pathway	7	228	0.0107	AKT2,ARF6,BCL2L1,GRB2,PAK1,PAK2,PRKCB
hsa04140	Autophagy - animal	5	125	0.0129	AKT2,BCL2L1,CTSD,IRS1,LAMP1
hsa04512	ECM-receptor interaction	4	81	0.0148	ITGB3,ITGB5,LAMB2,THBS1
hsa04926	Relaxin signaling pathway	5	130	0.0148	AKT2,GRB2,MAPK12,MMP9,TGFB1
hsa04350	TGF-beta signaling pathway	4	83	0.0157	IFNG,TGFB1,THBS1,TNF
hsa04973	Carbohydrate digestion and absorption	3	42	0.0157	AKT2,HK2,PRKCB
hsa04550	Signaling pathways regulating pluripotency of stem cells	5	138	0.0182	AKT2,GRB2,MAPK12,POU5F1,STAT3
hsa04211	Longevity regulating pathway	4	88	0.0185	AKT2,FOXO1,IRS1,SOD2
hsa04912	GnRH signaling pathway	4	88	0.0185	GRB2,MAP2K3,MAPK12,PRKCB
hsa00520	Amino sugar and nucleotide sugar metabolism	3	48	0.021	HK2,PGM1,UGP2
hsa04750	Inflammatory mediator regulation of TRP channels	4	92	0.021	IL1B,MAP2K3,MAPK12,PRKCB
hsa04150	mTOR signaling pathway	5	148	0.0226	AKT2,GRB2,IRS1,PRKCB,TNF
hsa04370	VEGF signaling pathway	3	59	0.0333	AKT2,MAPK12,PRKCB
hsa04722	Neurotrophin signaling pathway	4	116	0.0408	AKT2,GRB2,IRS1,MAPK12
hsa04612	Antigen processing and presentation	3	66	0.0434	HSPA1A,IFNG,TNF
hsa04611	Platelet activation	4	123	0.0473	AKT2,ITGB3,MAPK12,TBXA2R
hsa04622	RIG-I-like receptor signaling pathway	3	70	0.0485	MAPK12,TNF,TRADD
hsa04662	B cell receptor signaling pathway	3	71	0.0494	AKT2,GRB2,PRKCB

## Sheet: Excluded disease pathways
hsa05221	Acute myeloid leukemia	5	66	0.0013	AKT2,CD14,GRB2,MPO,STAT3
hsa05143	African trypanosomiasis	7	34	4.9e-07	IFNG,IL10,IL18,IL1B,IL6,PRKCB,TNF
hsa05034	Alcoholism	6	142	0.0049	DRD2,GRB2,H2AFZ,HIST1H2BJ,HIST2H2BE,HIST3H2A
hsa05330	Allograft rejection	9	35	2.36e-09	CD28,CD86,GZMB,IFNG,IL10,IL2,IL5,PRF1,TNF
hsa05146	Amoebiasis	11	94	2.43e-08	ACTN1,CD14,IFNG,IL10,IL1B,IL6,LAMB2,PRKCB,TGFB1,TLR4,TNF
hsa05014	Amyotrophic lateral sclerosis (ALS)	4	50	0.0036	BCL2L1,MAP2K3,MAPK12,TNF
hsa05310	Asthma	3	28	0.0062	IL10,IL5,TNF
hsa05320	Autoimmune thyroid disease	7	49	3.18e-06	CD28,CD86,GZMB,IL10,IL2,IL5,PRF1
hsa05142	Chagas disease (American trypanosomiasis)	12	101	4.5e-09	AKT2,CCL2,CCL5,IFNG,IL10,IL1B,IL2,IL6,MAPK12,TGFB1,TLR4,TNF
hsa05220	Chronic myeloid leukemia	4	76	0.0122	AKT2,BCL2L1,GRB2,TGFB1
hsa05414	Dilated cardiomyopathy (DCM)	5	88	0.0037	ITGB3,ITGB5,TGFB1,TNF,TPM1
hsa01522	Endocrine resistance	5	95	0.0048	AKT2,GRB2,MAPK12,MMP9,NCOA3
hsa05120	Epithelial cell signaling in Helicobacter pylori infection	3	66	0.0434	CCL5,MAPK12,PAK1
hsa05169	Epstein-Barr virus infection	9	194	0.00029	AKT2,HSPA1A,IFNG,IL10,MAP2K3,MAPK12,STAT3,TRADD,YWHAB
hsa05418	Fluid shear stress and atherosclerosis	10	133	3.1e-06	AKT2,CCL2,HMOX1,IFNG,IL1B,ITGB3,MAPK12,MMP9,NCF2,TNF
hsa05226	Gastric cancer	6	147	0.0057	AKT2,CDX2,GRB2,REG4,RXRA,TGFB1
hsa05214	Glioma	3	68	0.0459	AKT2,GRB2,PRKCB
hsa05332	Graft-versus-host disease	9	36	2.6e-09	CD28,CD86,GZMB,IFNG,IL1B,IL2,IL6,PRF1,TNF
hsa05161	Hepatitis B	11	142	7.45e-07	AKT2,GRB2,IL6,MMP9,PRKCB,STAT1,STAT3,TGFB1,TLR4,TNF,YWHAB
hsa05160	Hepatitis C	9	131	1.97e-05	AKT2,GRB2,MAPK12,RXRA,SOCS3,STAT1,STAT3,TNF,TRADD
hsa05225	Hepatocellular carcinoma	8	163	0.00046	AKT2,BCL2L1,BRD7,GRB2,HMOX1,PRKCB,TGFB1,TXNRD1
hsa05168	Herpes simplex infection	9	181	0.00018	CCL2,CCL5,CDC34,IFNG,IL1B,IL6,SOCS3,STAT1,TNF
hsa05166	HTLV-I infection	8	250	0.005	AKT2,BCL2L1,IL2,IL6,NRP1,POLE,TGFB1,TNF
hsa05165	Human papillomavirus infection	10	317	0.0018	AKT2,FOXO1,GRB2,ITGB3,ITGB5,LAMB2,STAT1,THBS1,TNF,TRADD
hsa05410	Hypertrophic cardiomyopathy (HCM)	6	81	0.00041	IL6,ITGB3,ITGB5,TGFB1,TNF,TPM1
hsa05321	Inflammatory bowel disease (IBD)	15	62	3.1e-14	IFNG,IL10,IL17A,IL17F,IL18,IL1B,IL2,IL22,IL5,IL6,STAT1,STAT3,TGFB1,TLR4,TNF
hsa05164	Influenza A	17	168	3.81e-11	AKT2,CCL2,CCL5,DNAJB1,HSPA1A,IFNG,IL18,IL1B,IL6,MAP2K3,MAPK12,PRKCB,SOCS3,STAT1,TLR4,TNF,TNFRSF10A
hsa05167	Kaposi's sarcoma-associated herpesvirus infection	7	183	0.0038	AKT2,CD86,IL6,MAPK12,STAT1,STAT3,TRADD
hsa05134	Legionellosis	8	54	5.08e-07	CD14,HSPA1A,IL18,IL1B,IL6,RAB1B,TLR4,TNF
hsa05140	Leishmaniasis	11	70	2.36e-09	FCGR3B,IFNG,IL10,IL1B,MAPK12,NCF2,PRKCB,STAT1,TGFB1,TLR4,TNF
hsa05144	Malaria	10	47	1.38e-09	CCL2,IFNG,IL10,IL18,IL1B,IL6,TGFB1,THBS1,TLR4,TNF
hsa05162	Measles	11	133	4.72e-07	AKT2,CD28,HSPA1A,IFNG,IL1B,IL2,IL6,STAT1,STAT3,TLR4,TNFRSF10A
hsa05206	MicroRNAs in cancer	10	149	7.39e-06	GRB2,HMOX1,IRS1,ITGB3,MMP9,PRKCB,SOCS1,STAT3,THBS1,TPM1
hsa04932	Non-alcoholic fatty liver disease (NAFLD)	8	149	0.00028	AKT2,IL1B,IL6,IRS1,RXRA,SOCS3,TGFB1,TNF
hsa05223	Non-small cell lung cancer	5	66	0.0013	AKT2,GRB2,PRKCB,RXRA,STAT3
hsa04380	Osteoclast differentiation	14	124	6.09e-10	AKT2,FCGR3B,GRB2,IFNG,IL1B,ITGB3,MAPK12,NCF2,OSCAR,SOCS1,SOCS3,STAT1,TGFB1,TNF
hsa05212	Pancreatic cancer	5	74	0.0019	AKT2,BCL2L1,STAT1,STAT3,TGFB1
hsa05130	Pathogenic Escherichia coli infection	3	53	0.0258	ARPC1B,CD14,TLR4
hsa05200	Pathways in cancer	18	515	5.47e-06	AKT2,BCL2L1,FOXO1,GRB2,HMOX1,IFNG,IL2,IL5,IL6,LAMB2,MMP9,NCOA3,PRKCB,RXRA,STAT1,STAT3,TGFB1,TXNRD1
hsa05133	Pertussis	7	74	3.07e-05	CD14,IL10,IL1B,IL6,MAPK12,TLR4,TNF
hsa01524	Platinum drug resistance	3	70	0.0485	AKT2,BCL2L1,REV3L
hsa05020	Prion diseases	3	33	0.0089	CCL5,IL1B,IL6
hsa05215	Prostate cancer	4	97	0.0238	AKT2,FOXO1,GRB2,MMP9
hsa05205	Proteoglycans in cancer	13	195	3.3e-07	AKT2,GRB2,ITGB3,ITGB5,MAPK12,MMP9,PAK1,PRKCB,STAT3,TGFB1,THBS1,TLR4,TNF
hsa05211	Renal cell carcinoma	5	68	0.0014	AKT2,GRB2,PAK1,PAK2,TGFB1
hsa05323	Rheumatoid arthritis	12	84	1.29e-09	CCL2,CCL5,CD28,CD86,IFNG,IL17A,IL18,IL1B,IL6,TGFB1,TLR4,TNF
hsa05132	Salmonella infection	9	84	8.57e-07	ARPC1B,CD14,DYNC1I2,IFNG,IL18,IL1B,IL6,MAPK12,TLR4
hsa05222	Small cell lung cancer	4	92	0.021	AKT2,BCL2L1,LAMB2,RXRA
hsa05150	Staphylococcus aureus infection	3	51	0.0238	FCGR3B,FPR2,IL10
hsa05322	Systemic lupus erythematosus	13	94	3.92e-10	ACTN1,CD28,CD86,ELANE,FCGR3B,H2AFZ,HIST1H2BJ,HIST2H2BE,HIST3H2A,IFNG,IL10,SNRPD3,TNF
hsa05145	Toxoplasmosis	14	109	1.87e-10	AKT2,BCL2L1,HSPA1A,IFNG,IL10,LAMB2,MAP2K3,MAPK12,SOCS1,STAT1,STAT3,TGFB1,TLR4,TNF
hsa05152	Tuberculosis	19	172	5.26e-13	AKT2,CAMP,CD14,CORO1A,CTSD,FCGR3B,IFNG,IL10,IL18,IL1B,IL6,LAMP1,MAPK12,STAT1,TGFB1,TLR4,TNF,TRADD,VDR
hsa05203	Viral carcinogenesis	8	183	0.00093	ACTN1,GRB2,GSN,HIST1H2BJ,HIST2H2BE,STAT3,TRADD,YWHAB
hsa05416	Viral myocarditis	3	56	0.0294	CD28,CD86,PRF1

## Sheet: manually curated pathways
KEGG Pathway ID	KEGG Pathway Name	Genes
hsa03013	RNA TRANSPORT	SUMO1, CASC3, NUP153
hsa03015	mRNA Surveillance	CASC3
hsa04020	Calcium Signalling Pathway	AVPR1B, CCKAR
hsa04024	cAMP Signalling Pathway	CAMP, FOS, EDN2, GHSR
hsa04080	Neuroactive ligand receptor interaction	PGE2, EDN2, AVPR1B, CCKAR, GHSR
hsa04144	Endocytosis	CXCR4, GIT2, ARFGAP3
hsa04151	p13_Akt Signalling pathway	CAMP
hsa04514	Cell adhesion molecules	TCN1, VCAN
hsa04530	Tight Junction	AMOTL2
hsa04610	Complement and coagulation cascades	F13A1
hsa04973	Pancreatic secretion	CCKAR
